1 **Longitudinal host transcriptional responses to SARS-CoV-2 infection in adults with**  
2 **extremely high viral load**

3

4 Vasanthi Avadhanula<sup>1†</sup>, Chad J. Creighton<sup>2,4,5†</sup>, Laura Ferlic-Stark<sup>1</sup>, Richard Sucgang<sup>7</sup>, Yiqun  
5 Zhang<sup>2</sup>, Divya Nagaraj<sup>1</sup>, Erin G. Nicholson<sup>1,6</sup>, Anubama Rajan<sup>1</sup>, Vipin Kumar Menon<sup>3,5</sup>,  
6 Harshavardhan Doddapaneni<sup>3,5</sup>, Donna Marie Muzny<sup>3,5</sup>, Ginger Metcalf<sup>3</sup>, Sara Joan Javornik  
7 Cregeen<sup>1</sup>, Kristi Louise Hoffman<sup>1</sup>, Richard A Gibbs<sup>3,5</sup>, Joseph Petrosino<sup>1</sup>, Pedro A Piedra<sup>1,6</sup>

8

9 1. Department of Molecular Virology and Microbiology, Baylor College of Medicine, Houston,  
10 TX, 77030, USA.

11 2. Dan L. Duncan Comprehensive Cancer Center Division of Biostatistics, Baylor College of  
12 Medicine, Houston, TX 77030, USA.

13 3. Department of Molecular and Human Genetics, Baylor College of Medicine, Houston, Texas,  
14 USA.

15 4. Department of Medicine, Baylor College of Medicine, Houston, TX 77030, USA.

16 5. Human Genome Sequencing Center, Baylor College of Medicine, Houston, TX 77030, USA.

17 6. Department of Pediatrics, Baylor College of Medicine, Houston, TX, 77030, USA.

18 7. Center for Health Data Science and Analytics, Houston Methodist Research Institute,  
19 Houston, TX 77030, USA

20 † co-first authors

21

22 Correspondence to: Pedro A Piedra @ [ppiedra@bcm.edu](mailto:ppiedra@bcm.edu) and Chad Creighton at  
23 [creight@bcm.edu](mailto:creight@bcm.edu)

24

25 Abbreviations: COVID-19, Coronavirus disease 19; SARS-CoV-2, severe acute respiratory  
26 syndrome coronavirus 2,

27

28

29

30

31

32

33

34 Abstract:

35 Current understanding of viral dynamics of SARS-CoV-2 and host responses driving the  
36 pathogenic mechanisms in COVID-19 is rapidly evolving. Here, we conducted a longitudinal  
37 study to investigate gene expression patterns during acute SARS-CoV-2 illness. Cases included  
38 SARS-CoV-2 infected individuals with extremely high viral loads early in their illness, individuals  
39 having low SARS-CoV-2 viral loads early in their infection, and individuals testing negative for  
40 SARS-CoV-2. We could identify widespread transcriptional host responses to SARS-CoV-2  
41 infection that were initially most strongly manifested in patients with extremely high initial viral  
42 loads, then attenuating within the patient over time as viral loads decreased. Genes correlated  
43 with SARS-CoV-2 viral load over time were similarly differentially expressed across independent  
44 datasets of SARS-CoV-2 infected lung and upper airway cells, from both in vitro systems and  
45 patient samples. We also generated expression data on the human nose organoid model during  
46 SARS-CoV-2 infection. The human nose organoid-generated host transcriptional response  
47 captured many aspects of responses observed in the above patient samples, while suggesting  
48 the existence of distinct host responses to SARS-CoV-2 depending on the cellular context,  
49 involving both epithelial and cellular immune responses. Our findings provide a catalog of  
50 SARS-CoV-2 host response genes changing over time.

51

## 52 Introduction

53 Severe acute respiratory syndrome coronavirus-2 (SARS-CoV-2) is the etiologic agent of the  
54 coronavirus disease 2019 (COVID-19) pandemic. The clinical spectrum of COVID-19, caused  
55 by SARS-CoV-2, is wide, ranging from asymptomatic infection to fatal disease. Risk factors for  
56 severe illness and death include age, sex, smoking, and comorbidities, such as obesity,  
57 hypertension, diabetes, and cardiovascular disease. Studies suggested that SARS-CoV-2 viral  
58 load can predict the likelihood of disease spread and severity<sup>1-3</sup>. A higher detectable SARS-  
59 CoV-2 plasma viral load was associated with worse respiratory disease severity<sup>4</sup>. Conversely,  
60 robust immune responses putatively mediate non-severe illness, in part, by controlling the  
61 replication of SARS-CoV-2<sup>5,6</sup>. Emerging evidence indicates that age and sex differences in the  
62 innate and adaptive immune response can explain the higher risks observed in older adults and  
63 male cases<sup>7,8</sup>.

64 Initial site of SARS-CoV-2 replication is the upper respiratory tract, and replication usually peaks  
65 within the first week of infection<sup>6</sup>. The amount of virus produced at the respiratory epithelium is  
66 considered to be a critical element in determining SARS-CoV-2 transmissibility, duration of  
67 illness or severity, although it is not the only factor<sup>9,10</sup>. Higher viral loads have been observed in  
68 hospitalized patients with severe disease, have been attributed to high transmission and  
69 superspreading events, and have resulted in prolonged viral RNA shedding<sup>1,11-15</sup>.

70 Specific anatomic site or host cell type where viral replication occurs, can also determine the  
71 course of infection. For example, angiotensin-converting enzyme 2 (ACE-2) and  
72 transmembrane serine protease 2 (TMPRSS2) receptors expression is highest in the upper  
73 respiratory tract and decreases in the distal or lower respiratory tract, incidentally SARS-CoV-2  
74 infection mirrored this pattern, with high replication in proximal (nasal) versus distal pulmonary  
75 (alveolar) epithelial cells<sup>16</sup>. Control of viral replication and resolution of the inflammatory

76 response is believed to be dependent, in part, on viral load and route of infection as well as the  
77 host immune response<sup>17</sup>. The early host immune response is regulated closely by the epithelial  
78 cell cytokine signaling in response to active viral replication<sup>18</sup>. Rapid and robust activation of the  
79 antiviral innate immune response at the site of viral replication is required to control and clear  
80 the virus. A delayed cytokine response can result in prolonged viral replication and worst clinical  
81 outcome as seen for other respiratory viruses<sup>19</sup>

82 Our understanding of the viral dynamics of SARS-CoV-2 and host responses driving the  
83 pathogenic mechanisms in COVID-19 is evolving rapidly. Multiple studies have reported various  
84 characteristics of immune/inflammatory responses to SARS-CoV-2. Cytokine or chemokines-  
85 related host inflammatory responses such as CCL2/MCP-1, CXCL10/IP-10, CCL3/MIP-1A, and  
86 CCL4/MIP-1B were detected in bronchoalveolar lavage samples of SARS-CoV-2 infected adults  
87 while activation of apoptosis and the P53 signaling pathway were observed in lymphocytes<sup>20</sup>.  
88 Inflammatory cytokine such as IL-1, IL-18, and IL-33 were enriched in the airways of COVID-19  
89 patients<sup>21</sup>. In addition, a shotgun host transcriptomic analysis on nasopharyngeal samples  
90 revealed a wide range of antiviral responses. These included gamma and alpha interferon  
91 responses, elevated levels of ACE-2, interferon stimulated genes (ISGs), and interferon  
92 inducible (IFI) genes<sup>22</sup>. Very few studies have demonstrated the temporal correlation between  
93 viral load and host gene expression. Variation in viral load was associated with the SARS-CoV-  
94 2 disease and the host response dynamics via innate and adaptive immunity (To et al., 2020).  
95 Another study revealed that expression of interferon-responsive genes, including ACE-2,  
96 increased as a function of viral load, while transcripts for B cell-specific proteins and neutrophil  
97 chemokines were elevated in patients with lower viral load<sup>23</sup>. Rouchka et.al. reported that  
98 cellular antiviral responses strongly correlated with viral loads. However, COVID-19 patients  
99 who experienced mild symptoms had a higher viral load than those with severe complications<sup>6</sup>.

100 We previously reported on a small group of adults with extremely high SARS-CoV-2 viral load,  
101 who had the potential to be super spreaders and a large group of adults with low SARS-CoV-2  
102 viral load, both groups had mild illness<sup>14</sup>. Here, we wanted to determine the host response in  
103 relation to the viral load early during infection. We conducted a longitudinal study to investigate  
104 gene expression patterns detected in the secretion of the nasal epithelium during the acute  
105 phase of SARS-CoV-2 infection. The cases included SARS-CoV-2 infected individuals with an  
106 extremely high viral load early in their illness matched to individuals who either had a low SARS-  
107 CoV-2 viral load early in their infection or were otherwise stable patients who tested negative for  
108 SARS-CoV-2 prior to their outpatient surgical or aerosol generating procedure. We also  
109 determined the transcriptional response of a human nose organoid (HNO) line infected with  
110 SARS-CoV-2 and compared it to transcriptomic profiles generated from the upper respiratory  
111 tract secretion collected by nasal swabs from SARS-CoV-2 infected individuals.

## 112 Results

### 113 *Study cohort*

114 Ten SARS-CoV-2 cases were randomly selected from our population of adults with extremely  
115 high viral load (Ct <16 to N1 target) at the time of their first RT-PCR positive test. For each high  
116 viral load case, two additional human subjects were matched based on gender, week of first  
117 SARS-CoV-2 RT-PCR test, age, and home zip code. These additional subjects consisted of  
118 either 1) SARS-CoV-2 infected adults with low viral load (Ct 31-<40) (SARS-CoV-2 low viral  
119 load case) or 2) stable adults who were SARS-CoV-2 RT-PCR negative (SARS-CoV-2 negative  
120 control) for their out-patient surgical or aerosol generating procedure. Each high viral load case  
121 had two to three subsequent SARS-CoV-2 RT-PCR positive mid-turbinate (MT) swab samples  
122 collected over a 4-week period. Each SARS-CoV-2 low viral load case had similarly spaced  
123 SARS-CoV-2 positive MT swab samples matched to its respective extremely high viral load

124 case. On the other hand, the SARS-CoV-2 negative control only had one MT-swab sample  
125 collected with no longitudinal follow-up and was used to establish the transcriptomic baseline in  
126 the respiratory epithelium during the time the extremely high and low viral load matched cases  
127 were identified. The demographic and visit characteristics for the cohort is presented in Table 1.  
128 In general, age, gender, race, ethnicity, and zip code were comparable between the extremely  
129 high viral load, low viral load, and SARS-CoV-2 negative adults. The adults in the SARS-CoV-2  
130 negative group were mostly asymptomatic at the time of testing, although their demographic  
131 information was not significantly different compared to that of both the SARS-CoV-2 extremely  
132 high and low viral load groups. The median Ct value difference between the extremely high and  
133 low viral load groups were 794,672-fold (19.6 Ct difference) and 724-fold (9.5 Ct difference)  
134 different at Visit 1 and Visit 2, respectively. At Visit 3, approximately 14 to 17 days after their  
135 Visit 1, the Ct values were comparable between the two groups.

136

### 137 *RNA sequencing of serially collected specimens.*

138 Of the 73 MT swab samples from the extremely high and low viral load SARS-CoV-2 groups  
139 with longitudinal follow-up and SARS-CoV-2 negative controls, only 44 (60.3%) MT swab  
140 samples from 20 (66.7%) individuals were of good quality to generate RNA-sequence data to  
141 study the host response to SARS-CoV-2 infection over time (Table 2). Demographic factors  
142 such as age, gender, race, ethnicity, zip code, disease severity and co-morbid conditions were  
143 comparable between the extremely high viral load, low viral load groups, and SARS-CoV-2  
144 negative control group. Host response data were available on eight cases (extremely high viral  
145 load) with 23 samples. Six of the 8 extremely high viral load cases had gene expression data for  
146 Visits 1, 2, and 3, and two others for Visit 1 and 3. On the other hand, eight low viral load cases  
147 had 17 samples with gene expression data. Only two of the low viral load cases had gene

148 expression data for Visit 1, 2, and 3. Another two low viral load cases had gene expression data  
149 at Visit 1, Visit 2 or 3, and Visit 4. The remaining four low viral load cases had gene expression  
150 data at Visit 1 only (n=1), Visit 2 only (n=2) or Visit 1 and 2 (n=1). Only 4 of the 10 SARS-CoV-2  
151 negative control adults had gene expression data. All together 44 MT swab samples were  
152 sequenced for RNA to observe gene expression changes in the host response of the cases with  
153 extremely high viral load over time, as compared to the SARS-CoV-2 low viral load matched  
154 cases and the negative controls.

### 155 *Gene expression changes by viral load*

156 From our RNA-seq dataset, we could identify widespread gene expression changes from the  
157 nasal epithelium attributable to transcriptional host responses to SARS-CoV-2 infection. By  
158 comparing the expression levels of each gene with the sample viral load (representing the  
159 inverse correlation with Ct value) across the 44 MT swab samples, 425 genes were statistically  
160 correlated at  $p < 0.01$  significance level and 112 genes at  $p < 0.001$  (Figure 1a, Pearson's  
161 correlation). A stricter statistical cutoff would involve fewer expected false positive genes from  
162 multiple testing. However, the above 425 genes with  $p < 0.01$  would still be highly enriched for  
163 true positives, as revealed by integrating these genes with information from external databases,  
164 as described below. We also compared the expression levels of genes at individual time points  
165 during infection of both the extremely high viral load and low viral load groups with the SARS-  
166 CoV-2 negative control group (Figure 1b). Comparing Visit 1 MT swab samples from the  
167 extremely high viral load cases (n=8 samples from eight subjects) with the MT swab samples in  
168 the SARS-CoV-2 negative control group (n=4) yielded the highest number of genes with  
169 statistically significant correlated expression, as opposed to comparisons involving later times  
170 for the extremely high viral load group or involving the low viral load group. The gene expression  
171 from the extremely high viral load cases at Visit 1 highly overlapped with the differentially  
172 expressed genes of the low viral load group at Visit 1 (Figure 1c) and remained highly correlated

173 throughout their last visit. Interestingly, genes from the extremely high viral load group that did  
174 not overlap with the low viral load group did not show significant overlap with information from  
175 external databases.

176 To further delineate the differences in host gene expression between extremely high and low  
177 SARS-CoV-2 viral load groups, we performed an upset plot analysis to identify unique and  
178 common intersecting genes between the samples (Figure S1). Among all the differentially  
179 expressed genes (DEGs) in the samples, 614 DEGs were unique to the subjects in the  
180 extremely high viral load group at visit 1 (first visit) and 226 genes were unique for the extremely  
181 high viral load at the last visit. The low viral load subjects on the first and last visit showed 157  
182 and 93 unique DEGs respectively. There were 31 DEGS that were common between all the  
183 groups. We performed the Gene ontology (GO) analysis of the unique and overlapping DEGs  
184 sets, and we found significant enrichment (FDR <0.05, count =3) of the biological processes  
185 including defense response to virus, negative regulation of viral genome replication, innate  
186 immune response, response to virus (Figure S2) that were uniquely expressed in the extremely  
187 high viral load group at visit 1. SARS-CoV-2 infection in the low viral load group at either the  
188 early or later phase of the infection and the extremely high viral load group at the last visit did  
189 not show statistically significant enrichment of GO biological process. These findings indicate  
190 that subjects with extremely high viral load at their initial visit were responding to the infection  
191 with increased immune responses, and thus preventing prolonged viral infection with a poor  
192 prognosis.

### 193 *Differentially expressed gene in respiratory samples from extremely high viral load adults*

194 Focusing on the 112 top gene expression correlates of viral load across the 44 MT swab  
195 samples ( $p < 0.001$ , Pearson's), 108 of these genes were higher in the SARS-CoV-2 infected  
196 adults with extremely high viral load. When visualizing the differential expression patterns of



197 these 108 genes by heat map (Figure 2a), the genes were highest at Visit 1 of the extremely  
198 high viral load group, then decreased in expression with subsequent time points, tracking with  
199 the decrease in viral load (i.e., increase in Ct value). The 108 genes showed intermediate  
200 relative expression levels in the low viral load group and low expression in the SARS-CoV-2  
201 negative control group. The 367 genes increased with extremely high viral load at  $p < 0.01$  were  
202 highly enriched for functional gene categories, as defined by GO annotation terms. Enriched GO  
203 terms (Figure 2b,  $p < 3 \times 10^{-5}$ , one-sided Fisher's exact test) included 'immune system process',  
204 'response to virus', 'type I interferon signaling pathway', 'cytokine-mediated signaling pathway',  
205 'response to stress', 'regulation of viral life cycle', 'immune response', 'response to cytokine',  
206 'innate immune response', 'response to interferon-gamma', 'regulation of I-kappaB kinase/NF-  
207 kappaB signaling', 'JAK-STAT cascade', 'protein ubiquitination', 'regulation of cell death', 'T cell  
208 activation', 'vesicle-mediated transport', and 'complement activation'. Of the 17 functional gene  
209 categories, there were five gene categories - 'response to virus', 'type 1 interferon signaling',  
210 'regulation of viral life cycle', 'response to interferon-gamma', and 'JAK-STAT cascade' – where  
211 approximately 20% or higher of the genes were over expressed for that pathway. Overall, the  
212 above gene categories were highly indicative as representing a host immune response to an  
213 acute viral infection. Some of the genes that were upregulated were *EIF2AK2* (eukaryotic  
214 translation initiation factor 2 alpha kinase 2), and *ZC3HAV1* (zinc finger CCCH-type containing,  
215 antiviral 1), which have anti-viral activity. Other genes like *IFIT2* and *IFIT3* (interferon induced  
216 protein with tetratricopeptide repeats) aid in apoptosis. Chemokine genes like *CXCL9* and  
217 *CXCL10* that are involved in T-cell trafficking were also highly expressed. In contrast, the 62  
218 genes decreased with high viral load at  $p < 0.01$  were not highly enriched for GO terms. Some of  
219 the genes that were downregulated included *OR4A16* and *OR10X1*, involved in olfactory  
220 responses; *SALL3* and *MAGB6*, which aid in downregulation of transcription; and *TUBA3E*,  
221 *MLN*, and *ISTN1*, affecting tubulin functions.

222 *Comparison of the top over expressed genes in respiratory samples from the extremely high*  
223 *and low viral load groups to other published data sets*

224 Genes correlated with SARS-CoV-2 viral load over time were similarly differentially expressed  
225 across independent datasets of SARS-CoV-2 infected lung and upper airway cells (Figure 3).  
226 We examined differential expression patterns for the top 112 genes, at  $p < 0.001$  significance  
227 level, correlated with SARS-CoV-2 viral load across our serial sampling cohort (by Pearson's) in  
228 two independent RNA-seq datasets of SARS-CoV-2 infection: one of lung cancer cell lines A549  
229 and Calu-3 infected with SARS-CoV-2 for 24 hours from Blanco-Melo et al<sup>24</sup>. and one of  
230 nasopharyngeal/oropharyngeal samples in 238 patients with COVID-19, other viral, or non-viral  
231 acute respiratory illnesses from Mick et al<sup>25</sup>. As a group, the genes that positively correlated  
232 with SARS-CoV-2 viral load were increased in SARS-CoV-2-infected Calu-3 cells and were high  
233 in samples of human subjects infected with SARS-CoV-2 or other viruses (Figure 3a). For the  
234 Mick et al. dataset, SARS-CoV-2 viral load data was available. Of the 112 genes correlated with  
235 viral load in our dataset, 105 were in common with the Mick et al. dataset, and 99 (94%) of  
236 these genes were positively correlated (Pearson's  $p < 0.05$ ) with viral load across the 94 SARS-  
237 CoV-2 infected patients. In contrast to Calu-3, A549 infected cells did not show as strong a  
238 correspondence to our 112-gene signature pattern. Taking the top genes that correlated  
239 positively with SARS-CoV-2 viral load across the Mick et al. patient samples ( $p < 0.01$ , Pearson's  
240 correlation) and the top genes over-expressed in SARS-CoV-2-infected Calu-3 cells ( $p < 0.01$ , t-  
241 test), these significantly overlapped with the genes that positively correlated ( $p < 0.01$ , Pearson's)  
242 with SARS-CoV-2 viral load across our serially collected MT swab samples with a high overlap  
243 among the respective dataset results (Figure 3b). The 136 genes overlapping among all three  
244 datasets involved cytokines and inflammatory response pathways. In contrast, there was limited  
245 overlap among the datasets involving genes under-expressed with SARS-CoV-2 infection  
246 between our data set to either Mick *et al.* or Calu-3 cells (Figure 3c). This in part may reflect the

247 potential differences in the respective SARS-CoV-2 variants causing the infection or differences  
248 in the illness severity of the host.

249 *Comparison of our respiratory sample gene sets to the transcriptional response of the human*  
250 *nose organoid infected with SARS-CoV-2*

251 As another means to identify host transcriptional responses to SARS-CoV-2 infection, we  
252 generated RNA-seq data on the human nose organoid model HNO<sup>26</sup>. We sampled HNO cells  
253 infected with SARS-CoV-2 and mock control cells at 6hrs, 72hrs, and 6 days post-infection, and  
254 we profiled these samples for gene expression. In the HNO204 RNA-seq dataset, 1760 genes  
255 were statistically significant at  $p < 0.05$  significance level and 341 genes, at  $p < 0.01$ , exceeding  
256 chance expected. The top 867 genes over-expressed in HNO with SARS-CoV-2 infection  
257 ( $p < 0.05$ , t-test) showed significant overlapping patterns with the above-mentioned independent  
258 RNA-seq datasets of SARS-CoV-2 infection (Figure 4a). Only a small, albeit statistically  
259 significant, fraction of the HNO204 over-expressed genes overlapped with the top 367 genes  
260 that correlated positively with SARS-CoV-2 viral load in our serial MT swab dataset (Figure 4b).  
261 Of the 867 overexpressed genes in SARS-CoV-2 infected HNO, 35 overlapped with the 367  
262 over expressed genes in the respiratory samples of extremely high and low viral load groups  
263 ( $p = 1E-5$ , one-sided Fisher's exact test). At the same time, a substantial fraction of the 867 HNO  
264 genes overlapped with the genes high with SARS-CoV-2 infection in both A549 and Calu-3 lung  
265 cancer cell lines (Figures 4a and 4b), with 178 Calu-3 genes overlapping ( $p < 1E-20$ , one-sided  
266 Fisher's exact test). In contrast, little overlap was observed between the genes under-expressed  
267 with SARS-CoV-2 infection in HNO and genes similarly under-expressed with SARS-CoV-2 in  
268 the other datasets (Figure 4c).

269 The 867 genes over-expressed in HNO at  $p < 0.05$  were significantly enriched for functional GO  
270 gene categories. Enriched GO terms (Figure 4d,  $p < = 0.0001$ , one-sided Fisher's exact test)

271 included 'vesicle', 'extracellular vesicle', 'intracellular vesicles', 'MAP kinase phosphatase  
272 activity', 'regulation of locomotion', 'peptidase activator activity', 'endosome membrane',  
273 'regulation of smooth muscle cell proliferation', 'regulation of cell motility', 'proteasomal protein  
274 catabolic process', 'negative regulation of signaling', 'programmed cell death', proteolysis  
275 involved in cellular protein catabolic process', and 'inactivation of MAPK pathway'. Overall, the  
276 over expressed genes are representative of the regulation of extracellular signaling from virus  
277 infection on a wide range of cellular responses and function. The above findings of the HNO  
278 transcriptional response to SARS-CoV-2 in relation to transcriptional responses observed in  
279 other models and patient samples would suggest the existence of distinct host responses to  
280 SARS-CoV-2 depending on cellular context, such as we previously observed between A549 and  
281 Calu-3 lung cancer cell lines. The host response observed in HNO is reflective of a complex  
282 epithelial cell population responding to a SARS-CoV-2 infection. On the other hand, the host  
283 response genes detected in the upper respiratory tract secretion of our prospective longitudinal  
284 cohort and those of Mick *et al.* patient samples are a composite of the epithelial and cellular  
285 immune responses to the viral infection.

## 286 Discussion

287 The primary site for SARS-CoV-2 replication is thought to be the ciliated cells in the  
288 nasopharynx or nasal olfactory mucosa. The viral replication initiates a signaling cascade to  
289 promote the production of interferons and chemokines by epithelial cells and thereby promote  
290 immune cell activation to control the virus. SARS-CoV-2 infection causes upregulation of  
291 cytokines including IL-2, IL-6, IL-10, IL-12 and MCP-1 detected in tissues and serum, as well as  
292 infiltration of infected tissues by inflammatory cells such as macrophages<sup>27</sup>. In the present  
293 study, RNA seq analysis of MT swabs from SARS-CoV-2 infected individuals identified robust  
294 induction of interferon inducible, cytokine, stress response, and immune-related genes. A  
295 variety of genes such as *OAS2*, *PARP9*, *OASL*, *IFIT2*, *IFI3*, *CCL8*, *CXCL10*, etc., were highly

296 upregulated and correlated with high viral load, suggesting that innate immune response genes  
297 were activated in a viral load dose response manner to control the viral infection. These results  
298 are very consistent with recent studies from upper respiratory tract samples, which reported  
299 upregulation of anti-viral factors and interferon response pathways<sup>22,23,28</sup>.

300 In our study samples, the numbers of genes that were upregulated were much higher compared  
301 to down regulated genes (367 vs 62). Some of genes that were downregulated included those  
302 which operate olfactory functions (*OR4A16* and *OR10X1*), downregulation of transcription  
303 (*SALL3* and *MAGB6*), and tubulin functions (*TUBA3E* and *MLN*, and *ISTN1*). Previous studies  
304 have reported larger numbers of down regulated host response genes especially involving  
305 olfactory receptor pathway, neutrophil degranulation, and vesicle formation—indicating the role  
306 of these genes in loss of olfactory function in SARS-CoV-2 infections as well as the viral control  
307 of host-cell machinery<sup>20,22,23</sup>. One other study also showed very low number of downregulated  
308 genes with SARS-CoV-2 infection<sup>29</sup>, one reason for the low number of downregulated genes  
309 observed in our longitudinal study could conceivably relate to the mild illness experienced by  
310 both the extremely high and low viral load groups, in addition to the timing of sample collection  
311 as compared to other studies as well as the SARS-CoV-2 variants respectively involved.

312 Remarkably, the highest number of significant expressed genes were driven by the extremely  
313 high viral load group at Visit 1 (first visit). Also, all the genes that were upregulated with the low  
314 viral load group at Visit 1 completely overlapped with the extremely high viral load group at Visit  
315 1 except for one gene, *-CNN2*, which plays a role in cell adhesion and muscle contraction. The  
316 predominant sets of genes involved in defense response to virus, type I interferon signaling  
317 pathway, cytokine-mediated signaling pathway—such as *CXCL10*, *TGFB*, *IFIT2*, *IFIT3*, *OAS1*,  
318 and *IRF1*—were not found significantly upregulated in the low viral load group. Consonant with  
319 this, Rouchka *et. al.* also observed that subjects with high viral loads had robust interferon and  
320 cellular anti-viral response and even exhibited strong inverse correlation with disease severity<sup>6</sup>.

321 We previously noted that some SARS-CoV-2 infected adults with low viral load experienced  
322 prolonged viral shedding and low fluctuation in viral load over time <sup>14</sup>. Absence or low  
323 expression of the anti-viral response in the low viral load group strengthens our observation of  
324 prolonged shedding in adults with a low viral load early in infection.

325 In our longitudinal study, the up-regulated host response genes that correlated with SARS-CoV-  
326 2 viral load over time in the respiratory secretion collected by the MT swabs were similarly  
327 differentially expressed across independent data sets of SARS-CoV-2 infected lung and upper  
328 airway cells <sup>24</sup>. About 170 of the differentially expressed genes observed in our study  
329 overlapped with SARS-COV-2 infected Calu-3 lung adenocarcinoma cell line but not with A549  
330 cells. The observed difference across the cell lines could possibly be attributed to A549 cells not  
331 supporting robust replication of SARS-CoV-2 due to the low expression of ACE-2 <sup>30</sup>. Similarly,  
332 207 up-regulated genes from our longitudinal study overlapped with nasopharyngeal swabs  
333 from SARS-CoV-2 infected patients (3). Genes involved in cytokines and inflammatory response  
334 pathways were the ones that overlapped the most, demonstrating that anti-viral innate immune  
335 responses are common with SARS-CoV-2 infections. In addition, the up-regulation of  
336 differentially expressed genes related to an inflammatory response in COVID-19 patients can  
337 result in the induction of interleukin-6 (IL-6), CXCL10 (IP-10), and TNF- $\alpha$  with hyperactivation of  
338 Th1/Th17 responses that results the recruitment and activation of pro-inflammatory neutrophils  
339 and macrophages into the airways <sup>31</sup>. This has been proposed as the prime reason for failure to  
340 resolve inflammation in severely symptomatic patients <sup>31,32</sup>.

341 To better understand the contribution of epithelial cellular responses to SARS-CoV-2, we  
342 compared differentially expressed genes in the respiratory secretion of adults infected with  
343 SARS-CoV-2 to those that were expressed in HNO infected with SARS-CoV-2. A small, albeit  
344 statistically significant, fraction (35 of 867) of the HNO up-regulated genes overlapped with the  
345 367 differentially expressed up-regulated genes detected from the SARS-CoV-2 cases from our

346 longitudinal cohorts. These included functional genes involved with intrinsic antiviral immunity  
347 and interferon signaling representing the epithelial cellular responses to SARS-CoV-2 infection.  
348 A greater number of up-regulated genes overlap between our longitudinal cohorts [170 (46.3%)  
349 of 367 genes] and the SARS-CoV-2 infected Calu-3 cell line [170 (9.3%) of 1836 genes]  
350 compared to our SARS-CoV-2 infected HNO204 line [35 (4.0%) of 867 genes]. This could  
351 reflect the difference in cellular complexity between the cell lines and greater diversity of the  
352 HNO epithelium resulting in fewer overlapping up-regulated genes. HNO204 is a complex  
353 pseudostratified epithelium composed of at least 9 different cell types including ciliated, goblet,  
354 secretory and basal cells<sup>33,34</sup>. In contrast, the Calu-3 cell line, was generated from a bronchial  
355 adenocarcinoma, a submucosal gland cell line of a single cell type<sup>35</sup>

356 Previous studies have demonstrated high expression of ACE2 in SARS-CoV-2 infected  
357 nasopharyngeal samples and these were greatly elevated in high viral load subjects, suggesting  
358 that higher replication occurs with increased receptor expression<sup>22</sup>. In our cohort we did not  
359 observe a statistically significant increase in *ACE2* expression in both extremely high and low  
360 viral load groups. However, the expression of *ACE2* was elevated in our HNO infected with  
361 SARS-CoV-2 but not *TMPRSS2*, which has increased expression in nasal airway epithelial  
362 brushings<sup>36</sup>.

363 In summary, our longitudinal study investigated gene expression patterns in SARS-CoV-2  
364 infected individuals with an extremely high viral load displayed strong immune responses that  
365 decreased over time, and eventually became comparable to those with low viral loads. We  
366 detected hundreds of up-regulated genes that were highly correlated to the SARS-CoV-2 viral  
367 load. Enriched cellular pathways involved in the innate immune response, antiviral interferon  
368 responses were observed in other cohorts of SARS-CoV-2 infected adults. A limited but highly  
369 significant up-regulated gene response overlapped with our human nose organoid line, a  
370 complex pseudostratified ciliated epithelium, suggesting that the gene expression profile

371 detected in SARS-CoV-2 infected adults is generated from both the epithelial and cellular  
372 immune responses. In conclusion, high SARS-CoV-2 viral loads primarily elicit a heightened  
373 host immune response for the control of viral replication and clearance.

374



375 Materials and Methods

376 *Study cohort*

377 Ten extremely high, viral load SARS-CoV-2 positive cases were matched to 10 low viral load  
378 SARS-CoV-2 positive adults, and 10 stable adults (SARS-CoV-2 negative controls) who were  
379 cleared for having an out-patient surgical or aerosol generating procedure. The cases and  
380 controls were selected from our population of 17,644 adults (24,822 samples) evaluated in the  
381 outpatient clinics at Baylor College of Medicine (BCM) and their affiliate institutions from March  
382 18, 2020, through January 16, 2021, as previously described<sup>14</sup>. Three distinct adult populations  
383 were tested: 1) symptomatic employees utilizing occupational health services, 2) patients  
384 evaluated at medical and surgical clinics, and 3) patients who required clearance for an out-  
385 patient surgical or aerosol generating procedure. Serial samples were obtained from individuals  
386 who came back to be tested for evidence that the virus was cleared or were enrolled as sub-  
387 study to determine the viral shedding kinetics. Testing for SARS-CoV-2 was performed in our  
388 Clinical Laboratory Improvement Amendments (CLIA) Certified Respiratory Virus Diagnostic  
389 Laboratory (ID#: 45D0919666). Although RT-PCR testing was performed as a service to BCM,  
390 the collection of metadata was performed under an Institutional Review Board approved  
391 protocol with waiver of consent.

392 The extremely high viral load cases consisted of adults with an extremely high viral load (Ct  
393 <16) for the N1 target on their first mid-turbinate (MT) sample and had at least two subsequent  
394 positive MT samples<sup>14</sup>. Of the 104 individuals with an extremely high viral load in their first test,  
395 30 individuals met the criteria for multiple positive samples over the ensuing 4 weeks. Adults  
396 from two other groups were matched to each extremely high viral load case: a low viral load (Ct  
397 31-<40) SARS-CoV-2 positive adult (SARS-CoV-2 low viral load) and an otherwise stable  
398 control who tested negative for SARS-CoV-2 (SARS-CoV-2 negative control) and was cleared

399 for an out-patient surgical or aerosol generating procedure. Of the 453 individuals with a low  
400 viral load in their first test, 126 individuals met the criteria for multiple positive samples over the  
401 ensuing 4 weeks. The extremely high viral load cases were matched to the other two groups by  
402 gender, week of first test (+ 1 week), age (+ 1 year) and zip code (5 digits). If a match could not  
403 be found the range of the factors were expanded to + 3 weeks of first test, + 10 years and 3  
404 digits for the zip code. The ten extremely high viral load cases were randomly selected from our  
405 pool of 30 individuals with an extremely high viral load with multiple positive MT samples. The  
406 best matched SARS-CoV-2 low viral load case and negative control were then selected for each  
407 extremely high viral load case.

#### 408 *SARS-CoV-2 RT- PCR*

409 Viral RNA extraction and RT-PCR testing was performed as previously described (Avadhanula  
410 et al., 2021). In brief, viral RNA was extracted using the Qiagen Viral RNA Mini Kit (QIAGEN  
411 Sciences, Maryland, USA) with an automated extraction platform QIAcube (QIAGEN, Hilden,  
412 Germany). The extracted RNA samples were tested by CDC 2019-novel coronavirus (2019-  
413 nCoV) Real-Time RT-PCR Diagnostic panel [CDC 2019-Novel Coronavirus (2019-nCoV) Real-  
414 Time RT-PCR Diagnostic Panel for Emergency Use Only Instructions for Use]. RT-PCR  
415 reaction was set up using TaqPath™ 1-Step RT-qPCR Master Mix, CG (Applied Biosystems,  
416 CA) and run on 7500 Fast Dx Real-Time PCR Instrument with SDS 1.4 software. Respiratory  
417 samples with cycle threshold (Ct) values <40 for both N1 and N2 primers were considered RT-  
418 PCR positive for SARS-CoV-2.

#### 419 *Human Nose organoid model.*

420 The differentiated human nose organoid derived air liquid interface (HNO-ALI) cells were  
421 apically infected with SARS-CoV-2 [Isolate USA-WA1/2020, obtained from Biodefense and  
422 Emerging Infectious resources (BEI)] at a multiplicity of infection of 0.01 or mock infected with

423 airway organoid differentiation media, as previously described<sup>26</sup>. At the respective time points,  
424 the apical side of the transwells was washed twice and the cells were lysed using lysis buffer of  
425 RNeasy mini kit and RNA extracted.

#### 426 *RNA extraction, library preparation and sequencing*

427 Samples were extracted using the Qiagen RNeasy mini kit (#74104 rev. 10/19) following the  
428 manufacturer's protocol for samples <5e6 cells. Samples were eluted in 50ul RNase-free water.  
429 RNA quality and quantity were estimated using Agilent Bioanalyzer OR Caliper GX. To monitor  
430 sample and process consistency, 1 µl of the 1:50 diluted synthetic RNA designed by External  
431 RNA Controls Consortium (ERCC) (4456740, ThermoFisher) was added. Whole transcriptome  
432 sequencing (total RNAseq) data was generated using the Illumina TruSeq Stranded Total RNA  
433 with Ribo-Zero Globin kit (20020612, Illumina Inc.) cDNA was prepared following rRNA and  
434 Globin mRNA depletion, and paired-end libraries were prepared on Beckman BioMek FXp liquid  
435 handlers. For this, cDNA was A-tailed followed by ligation of the TruSeq UD Indexes (Cat #  
436 20022370) and amplified for 15 PCR cycles following manufacturer's recommendation. AMPure  
437 XP beads (A63882, Beckman Coulter) were used for library purification. Libraries were  
438 quantified using a Fragment Analyzer (Agilent Technologies, Inc) electrophoresis system and  
439 pooled in equimolar ratios. This pool was quantified using qPCR to determine loading  
440 concentration for sequencing. Sequencing was performed on the NovaSeq 6000 instrument  
441 using the S4 reagent kit (300 cycles) to generate 2x150bp paired end reads.

#### 442 *Primary Analysis for Total RNASeq*

443 The RNA-Seq analysis pipeline cleans and processes raw RNA sequencing data (FASTQs),  
444 providing robust QC metrics and has the flexibility to map the reads to GRCh38 reference  
445 genome (after excluding the alternate contigs). The latest versions of software for sequence  
446 alignment (STAR v2.7.3a), for marking of duplicate reads (Picard v2.22.5) and for conversion of  
447 BAM files to FASTQ files (Samtools v.1.9) are part of this pipeline. In addition to these

448 components, the pipeline uses RSEM (v.1.3.3) for measuring gene expression and RNA-SeQC  
449 (v.1.1.9), Qualimap2 (v2.2.1) and ERCCQC (v.1.0) to generate quality control metrics on the  
450 RNA-Seq data. The pipeline also produces the raw gene features counts by using  
451 featureCounts (v2.0.1).

#### 452 *Gene expression analysis*

453 For our serial MT swab dataset, where RNA-seq data were generated in different batches  
454 involving time and differences in extraction and processing methods, Combat algorithm<sup>37</sup> was  
455 used to correct for any observed batch effects. Fragments Per Kilobase Million (FPKM) values  
456 were quantile normalized<sup>38</sup> and log2-transformed. The differential expression analyses to define  
457 the host transcriptional response focus on 20000 genes for which an Entrez identifier could be  
458 associated with the transcript feature. To identify expression patterns associated with the host  
459 transcriptional response to SARS-CoV-2 infection in the serial MT swab dataset, Log2  
460 expression values correlated with SARS-CoV-2 Ct values across all 44 samples in the RNA-seq  
461 dataset. Additional two-group comparisons were carried using t-test on log2 expression values.  
462 For the HNO204 nose organoid dataset, Log2 expression values were compared between  
463 SARS-CoV-2 and Mock control by t-test, combining time points of 6hrs, 72hrs, and 6 days for  
464 each group.

#### 465 *Analysis of external transcriptome datasets*

466 To define transcriptional signatures of the host cell response to SARS-CoV-2 infection in lung  
467 cancer cells, we referred to the GSE147507 RNA-seq dataset<sup>39</sup>. In this dataset, A549 and  
468 Calu-3 were mock-treated or infected with SARS-CoV-2 and then profiled for gene expression.  
469 We used data from the SARS-CoV-2 profiling experiments involving multiplicity-of-infection  
470 (MOI) of 2. We converted raw gene-level sequencing read counts to reads per million Mapped  
471 (RPM) values and then log2-transformed them<sup>37</sup>. For the Mick et al. RNA-seq dataset of

472 nasopharyngeal/oropharyngeal samples in 238 patients with COVID-19, other viral, or non-viral  
473 acute respiratory illnesses <sup>25</sup>, RPM values were quantile normalized before the analysis.

#### 474 *Statistical analysis*

475 All p-values were two-sided unless otherwise specified. We performed all tests using log2-  
476 transformed gene expression values. False Discovery Rates (FDRs) due to multiple testing of  
477 genes were estimated using the method of Storey and Tibshirini <sup>40</sup>. Even in instances of  
478 nominally significant genes only moderately exceeding chance expectations by FDR, the  
479 nominally significant genes were found in downstream enrichment analyses (involving functional  
480 gene sets and results of external SARS-CoV-2-related RNA-seq datasets) to contain molecular  
481 information representing real biological differences. We evaluated enrichment of GO annotation  
482 terms <sup>41</sup> within sets of differentially expressed genes using SigTerms software <sup>42</sup> and one-sided  
483 Fisher's exact tests. Visualization using heat maps was performed using JavaTreeview (version  
484 1.1.6r4) <sup>43,44</sup>. Gene ontology (GO) analysis of DEGs used in the upset plot (Figure S1) was  
485 performed using the web-based Database for Annotation, Visualization, and Integrated  
486 Discovery (DAVID; version - v2023q1) <sup>45,46</sup>

#### 487 *Data Availability*

488 The RNA-seq dataset of serially collected samples and of nose organoids will be deposited at  
489 Gene Expression Omnibus (GEO) (GEO accession number pending). In terms of previously  
490 published data, we obtained RNA-seq expression data from experimental models of SARS-  
491 CoV-2 viral infection or other treatments from GEO (GSE147507). The Mick et al. RNA-seq  
492 dataset is available at GEO (GSE156063).

493

494 Figure Legends

495 **Figure 1. Differential gene sets associated with the transcriptional host response to**  
496 **SARS-CoV-2 infection across serially collected samples. (a)** For each of 20000 genes,  
497 expression (log<sub>2</sub> FPKM) was correlated with viral load (inverse correlation with Ct value) across  
498 44 samples from 20 subjects. Numbers of statistically significant genes (by Pearson's) at both  
499  $p < 0.01$  and  $p < 0.001$  significance levels are represented, as compared to the chance expected  
500 by multiple testing. **(b)** Numbers of differential genes ( $p < 0.01$ , t-test) when comparing: 1) Visit 1  
501 samples from the extremely high viral load group (n=8 samples from eight subjects) with the  
502 samples in the negative group (n=4); samples at the latest time points for each of the subjects  
503 from the extremely high viral load group (n=8 samples) with the samples in the negative group;  
504 samples from the low viral load group (n=8 samples from eight subjects, using earliest time  
505 point) with the samples in the negative group. Chance expected genes at  $p < 0.01$  due to multiple  
506 testing would be on the order of 200<sup>40</sup>. **(c)** Heat map comparing differential patterns across the  
507 three comparisons from part b, for the 1357 genes significant ( $p < 0.01$ ) for any comparison.  
508 Columns off to the side indicated which genes were correlated with viral load ( $p < 0.01$ ) across all  
509 44 samples (from part a), and which genes have Gene Ontology (GO) annotation<sup>41</sup> 'response  
510 to virus'.

511 **Figure 2. Differential expression patterns and functional gene groups associated with**  
512 **SARS-CoV-2 viral load across serially collected samples. (a)** Across 44 MT swab samples  
513 representing 20 subjects, differential gene expression patterns for the set of 112 genes  
514 significantly correlated with SARS-CoV-2 viral load (i.e., inversely correlated with Ct value) at  
515  $p < 0.001$  (Pearson's) are represented. Heat map contrast (bright yellow/blue) is 3-fold change  
516 from the average of the samples from the low viral load group. Genes listed off to the right have  
517 GO annotation 'response to virus'. Extremely high viral load, Ct < 20. **(b)** Selected significantly  
518 enriched GO terms<sup>41</sup> within the genes over-expressed with SARS-CoV-2 viral load ( $p < 0.01$ ,

519 Pearson's). For each GO term, enrichment p-values and numbers of genes in the SARS-CoV-2-  
520 associated gene set are indicated. Enrichment p-values by one-sided Fisher's exact test.

521 **Figure 3. Genes correlated with SARS-CoV-2 viral load over time are similarly expressed**  
522 **in independent datasets of SARS-CoV-2 infected lung and upper airway cells. (a)**

523 Differential expression patterns for the 112 genes correlated with SARS-CoV-2 viral load across  
524 our serial sampling cohort ( $p < 0.001$ , from Figure 2a) were examined in two independent RNA-  
525 seq datasets of SARS-CoV-2 infection: one of lung cancer cell lines (A549 and Calu-3) infected  
526 with SARS-CoV-2 at multiplicity-of-infection (MOI) of 2 for 24 hours<sup>39</sup>, and one of  
527 nasopharyngeal/oropharyngeal samples in 238 patients with COVID-19, other viral, or non-viral  
528 acute respiratory illnesses<sup>25</sup>. Gene order is the same across all datasets. Heat map contrast  
529 (bright yellow/blue) is 3-fold change from the corresponding comparison group (serial sampling  
530 dataset, average of the samples from the low viral load group; lung cancer cell line dataset,  
531 average of corresponding mock control group; Mick et al. dataset, average of "no virus"  
532 samples). **(b)** Venn diagram representing the gene set overlaps among the genes increased  
533 with SARS-CoV-2 infection in each of the three RNA-seq datasets from part a (with Calu-3 lung  
534 cancer cell line being considered here over A549). A p-value cutoff of  $p < 0.01$  was used to  
535 define top genes for each dataset (serial MT swab and Mick et al.  
536 nasopharyngeal/oropharyngeal datasets, Pearson's correlation with viral load; Calu-3 dataset, t-  
537 test). Gene set enrichment p-values by one-sided Fisher's exact test. Genes overlapping  
538 between all three datasets are listed. **(c)** Similar to part b, but for genes decreased with SARS-  
539 CoV-2 infection.

540 **Figure 4. Differential expression patterns and functional gene groups associated with**  
541 **SARS-CoV-2 infection of nose organoids. (a)** HNO204 human nose organoids were infected  
542 with SARS-CoV-2 at an MOI of 0.01, and samples at 6hrs, 72hrs, and 6 days post infection  
543 were profiled for gene expression. Differential expression patterns for the top 867 genes over-

544 expressed in HNO204 with SARS-CoV-2 infection ( $p < 0.05$ , t-test) are represented here. Next to  
545 the HNO204 dataset are the corresponding patterns for independent RNA-seq datasets of  
546 SARS-CoV-2 infection: lung cancer cell lines (A549 and Calu-3)<sup>37</sup>, our serially collected MT  
547 swab samples from patients, and nasopharyngeal/oropharyngeal samples from Mick et al<sup>25</sup>.  
548 Gene order is the same across all datasets. Heat map contrast (bright yellow/blue) is 3-fold  
549 change from the corresponding comparison group. **(b)** Venn diagram representing the gene set  
550 overlaps among the genes increased with SARS-CoV-2 infection in each of the following RNA-  
551 seq datasets: HNO204, serial MT swab, and Calu-3 lung cancer cell line. Gene set enrichment  
552 p-values by one-sided Fisher's exact test. Genes overlapping between HNO204 and serial MT  
553 swab datasets are listed. **(c)** Similar to part b, but for genes decreased with SARS-CoV-2  
554 infection. **(d)** Selected significantly enriched GO terms<sup>41</sup> within the genes over-expressed with  
555 SARS-CoV-2 infection in HNO204 ( $p < 0.05$ , t-test). For each GO term, enrichment p-values and  
556 numbers of genes in the SARS-CoV-2-associated gene set are indicated. Enrichment p-values  
557 by one-sided Fisher's exact test.



558 References

- 559 1. Fajnzylber J, Regan J, Coxen K, et al. SARS-CoV-2 viral load is associated with  
560 increased disease severity and mortality. *Nat Commun.* 2020;11(1):5493.  
561 doi:10.1038/s41467-020-19057-5
- 562 2. He X, Lau EHY, Wu P, et al. Temporal dynamics in viral shedding and transmissibility of  
563 COVID-19. *Nat Med.* 2020;26(5):672-675. doi:10.1038/s41591-020-0869-5
- 564 3. Oran DP, Topol EJ. Prevalence of Asymptomatic SARS-CoV-2 Infection □: A Narrative  
565 Review. *Ann Intern Med.* 2020;173(5):362-367. doi:10.7326/M20-3012
- 566 4. Pujadas E, Chaudhry F, McBride R, et al. SARS-CoV-2 viral load predicts COVID-19  
567 mortality. *Lancet Respir Med.* 2020;8(9):e70. doi:10.1016/S2213-2600(20)30354-4
- 568 5. Lucas C, Klein J, Sundaram ME, et al. Delayed production of neutralizing antibodies  
569 correlates with fatal COVID-19. *Nat Med.* 2021;27(7):1178-1186. doi:10.1038/s41591-  
570 021-01355-0
- 571 6. Rouchka EC, Chariker JH, Alejandro B, et al. Induction of interferon response by high  
572 viral loads at early stage infection may protect against severe outcomes in COVID-19  
573 patients. *Sci Rep.* 2021;11(1):15715. doi:10.1038/s41598-021-95197-y
- 574 7. Rydzynski Moderbacher C, Ramirez SI, Dan JM, et al. Antigen-Specific Adaptive  
575 Immunity to SARS-CoV-2 in Acute COVID-19 and Associations with Age and Disease  
576 Severity. *Cell.* 2020;183(4):996-1012.e19. doi:10.1016/j.cell.2020.09.038
- 577 8. Takahashi T, Ellingson MK, Wong P, et al. Sex differences in immune responses that  
578 underlie COVID-19 disease outcomes. *Nature.* 2020;588(7837):315-320.  
579 doi:10.1038/s41586-020-2700-3

- 580 9. Puhach O, Adea K, Hulo N, et al. Infectious viral load in unvaccinated and vaccinated  
581 individuals infected with ancestral, Delta or Omicron SARS-CoV-2. *Nat Med*.  
582 2022;28(7):1491-1500. doi:10.1038/s41591-022-01816-0
- 583 10. Liu J, Liao X, Qian S, et al. Community transmission of severe acute respiratory  
584 syndrome Coronavirus 2, Shenzhen, China, 2020. *Emerg Infect Dis*. 2020;26(6):1320-  
585 1323. doi:10.3201/eid2606.200239
- 586 11. Jones TC, Biele G, Mühlemann B, et al. Estimating infectiousness throughout SARS-  
587 CoV-2 infection course. *Science (80- )*. 2021;373(6551):eabi5273.  
588 doi:10.1126/science.abi5273
- 589 12. van Kampen JJA, van de Vijver DAMC, Fraaij PLA, et al. Duration and key determinants  
590 of infectious virus shedding in hospitalized patients with coronavirus disease-2019  
591 (COVID-19). *Nat Commun*. 2021;12(1):267. doi:10.1038/s41467-020-20568-4
- 592 13. Puhach O, Meyer B, Eckerle I. SARS-CoV-2 viral load and shedding kinetics. *Nat Rev*  
593 *Microbiol*. Published online 2022. doi:10.1038/s41579-022-00822-w
- 594 14. Avadhanula V, Nicholson EG, Ferlic-Stark L, et al. Viral Load of Severe Acute  
595 Respiratory Syndrome Coronavirus 2 in Adults During the First and Second Wave of  
596 Coronavirus Disease 2019 Pandemic in Houston, Texas: The Potential of the  
597 Superspreader. *J Infect Dis*. Published online February 15, 2021.  
598 doi:10.1093/infdis/jiab097
- 599 15. Goyal A, Reeves DB, Cardozo-Ojeda EF, Schiffer JT, Mayer BT. Viral load and contact  
600 heterogeneity predict SARS-CoV-2 transmission and super-spreading events. Walczak  
601 AM, Childs L, Forde J, eds. *Elife*. 2021;10:e63537. doi:10.7554/eLife.63537
- 602 16. Hou YJ, Okuda K, Edwards CE, et al. SARS-CoV-2 Reverse Genetics Reveals a Variable

- 603 Infection Gradient in the Respiratory Tract. *Cell*. 2020;182(2):429-446.e14.  
604 doi:10.1016/j.cell.2020.05.042
- 605 17. Schultze JL, Aschenbrenner AC. COVID-19 and the human innate immune system. *Cell*.  
606 2021;184(7):1671-1692. doi:10.1016/j.cell.2021.02.029
- 607 18. Chua RL, Lukassen S, Trump S, et al. COVID-19 severity correlates with airway  
608 epithelium-immune cell interactions identified by single-cell analysis. *Nat Biotechnol*.  
609 2020;38(8):970-979. doi:10.1038/s41587-020-0602-4
- 610 19. Nicholson EG, Schlegel C, Garofalo RP, et al. Robust cytokine and chemokine response  
611 in nasopharyngeal secretions: Association with decreased severity in children with  
612 physician diagnosed bronchiolitis. *J Infect Dis*. 2016;214(4). doi:10.1093/infdis/jiw191
- 613 20. Xiong Y, Liu Y, Cao L, et al. Transcriptomic characteristics of bronchoalveolar lavage fluid  
614 and peripheral blood mononuclear cells in COVID-19 patients. *Emerg Microbes Infect*.  
615 2020;9(1):761-770. doi:10.1080/22221751.2020.1747363
- 616 21. Daamen AR, Bachali P, Owen KA, et al. Comprehensive transcriptomic analysis of  
617 COVID-19 blood, lung, and airway. *Sci Rep*. 2021;11(1):7052. doi:10.1038/s41598-021-  
618 86002-x
- 619 22. Butler D, Mozsary C, Meydan C, et al. Shotgun transcriptome, spatial omics, and  
620 isothermal profiling of SARS-CoV-2 infection reveals unique host responses, viral  
621 diversification, and drug interactions. *Nat Commun*. 2021;12(1):1660.  
622 doi:10.1038/s41467-021-21361-7
- 623 23. Lieberman NAP, Peddu V, Xie H, et al. In vivo antiviral host transcriptional response to  
624 SARS-CoV-2 by viral load, sex, and age. *PLOS Biol*. 2020;18(9):e3000849.  
625 <https://doi.org/10.1371/journal.pbio.3000849>

- 626 24. Blanco-Melo D, Nilsson-Payant BE, Liu W-C, et al. Imbalanced Host Response to SARS-  
627 CoV-2 Drives Development of COVID-19. *Cell*. 2020;181(5):1036-1045.e9.  
628 doi:10.1016/j.cell.2020.04.026
- 629 25. Mick E, Kamm J, Pisco AO, et al. Upper airway gene expression reveals suppressed  
630 immune responses to SARS-CoV-2 compared with other respiratory viruses. *Nat*  
631 *Commun*. 2020;11(1):5854. doi:10.1038/s41467-020-19587-y
- 632 26. Rajan A, Weaver AM, Aloisio GM, et al. The Human Nose Organoid Respiratory Virus  
633 Model: an Ex Vivo Human Challenge Model To Study Respiratory Syncytial Virus (RSV)  
634 and Severe Acute Respiratory Syndrome Coronavirus 2 (SARS-CoV-2) Pathogenesis  
635 and Evaluate Therapeutics. *MBio*. 2022;13(1):e0351121. doi:10.1128/mbio.03511-21
- 636 27. Tjan LH, Furukawa K, Nagano T, et al. Early Differences in Cytokine Production by  
637 Severity of Coronavirus Disease 2019. *J Infect Dis*. 2021;223(7):1145-1149.  
638 doi:10.1093/infdis/jiab005
- 639 28. Zhang C, Feng Y-G, Tam C, Wang N, Feng Y. Transcriptional Profiling and Machine  
640 Learning Unveil a Concordant Biosignature of Type I Interferon-Inducible Host Response  
641 Across Nasal Swab and Pulmonary Tissue for COVID-19 Diagnosis. *Front Immunol*.  
642 2021;12:733171. doi:10.3389/fimmu.2021.733171
- 643 29. Saravia-Butler AM, Schisler JC, Taylor D, et al. Host transcriptional responses in nasal  
644 swabs identify potential SARS-CoV-2 infection in PCR negative patients. *iScience*.  
645 2022;25(11):105310. doi:10.1016/j.isci.2022.105310
- 646 30. Chang C-W, Parsi KM, Somasundaran M, et al. A Newly Engineered A549 Cell Line  
647 Expressing ACE2 and TMPRSS2 Is Highly Permissive to SARS-CoV-2, Including the  
648 Delta and Omicron Variants. *Viruses*. 2022;14(7). doi:10.3390/v14071369

- 649 31. Diamond MS, Kanneganti T-D. Innate immunity: the first line of defense against SARS-  
650 CoV-2. *Nat Immunol.* 2022;23(2):165-176. doi:10.1038/s41590-021-01091-0
- 651 32. Darif D, Hammi I, Kihel A, El Idrissi Saik I, Guessous F, Akarid K. The pro-inflammatory  
652 cytokines in COVID-19 pathogenesis: What goes wrong? *Microb Pathog.*  
653 2021;153:104799. doi:10.1016/j.micpath.2021.104799
- 654 33. Rajan A, Weaver AM, Aloisio GM, et al. The Human Nose Organoid Respiratory Virus  
655 Model: an Ex Vivo Human Challenge Model To Study Respiratory Syncytial Virus (RSV)  
656 and Severe Acute Respiratory Syndrome Coronavirus 2 (SARS-CoV-2) Pathogenesis  
657 and Evaluate Therapeutics. *MBio.* 2021;13(1):e0351121. doi:10.1128/mbio.03511-21
- 658 34. Travaglini KJ, Nabhan AN, Penland L, et al. A molecular cell atlas of the human lung from  
659 single-cell RNA sequencing. *Nature.* 2020;587(7835):619-625. doi:10.1038/s41586-020-  
660 2922-4
- 661 35. Fogh J, Fogh JM, Orfeo T. One hundred and twenty-seven cultured human tumor cell  
662 lines producing tumors in nude mice. *J Natl Cancer Inst.* 1977;59(1):221-226.  
663 doi:10.1093/jnci/59.1.221
- 664 36. Sajuthi SP, DeFord P, Li Y, et al. Type 2 and interferon inflammation regulate SARS-  
665 CoV-2 entry factor expression in the airway epithelium. *Nat Commun.* 2020;11(1):5139.  
666 doi:10.1038/s41467-020-18781-2
- 667 37. Chen F, Zhang Y, Sucgang R, et al. Meta-analysis of host transcriptional responses to  
668 SARS-CoV-2 infection reveals their manifestation in human tumors. *Sci Rep.*  
669 2021;11(1):2459. doi:10.1038/s41598-021-82221-4
- 670 38. Johnson WE, Li C, Rabinovic A. Adjusting batch effects in microarray expression data  
671 using empirical Bayes methods. *Biostatistics.* 2007;8(1):118-127.

672 doi:10.1093/biostatistics/kxj037

673 39. Ashburner M, Ball CA, Blake JA, et al. Gene ontology: tool for the unification of biology.

674 The Gene Ontology Consortium. *Nat Genet.* 2000;25(1):25-29. doi:10.1038/75556

675 40. Bolstad BM, Irizarry RA, Astrand M, Speed TP. A comparison of normalization methods

676 for high density oligonucleotide array data based on variance and bias. *Bioinformatics.*

677 2003;19(2):185-193. doi:10.1093/bioinformatics/19.2.185

678 41. Storey JD, Tibshirani R. Statistical significance for genomewide studies. *Proc Natl Acad*

679 *Sci U S A.* 2003;100(16):9440-9445. doi:10.1073/pnas.1530509100

680 42. Creighton CJ, Nagaraja AK, Hanash SM, Matzuk MM, Gunaratne PH. A bioinformatics

681 tool for linking gene expression profiling results with public databases of microRNA

682 target predictions. *RNA.* 2008;14(11):2290-2296. doi:10.1261/rna.1188208

683 43. Saldanha AJ. Java Treeview--extensible visualization of microarray data. *Bioinformatics.*

684 2004;20(17):3246-3248. doi:10.1093/bioinformatics/bth349

685 44. Pavlidis P, Noble WS. Matrix2png: a utility for visualizing matrix data. *Bioinformatics.*

686 2003;19(2):295-296. doi:10.1093/bioinformatics/19.2.295

687 45. Huang DW, Sherman BT, Lempicki RA. Systematic and integrative analysis of large gene

688 lists using DAVID bioinformatics resources. *Nat Protoc.* 2009;4(1):44-57.

689 doi:10.1038/nprot.2008.211

690 46. Sherman BT, Hao M, Qiu J, et al. DAVID: a web server for functional enrichment analysis

691 and functional annotation of gene lists (2021 update). *Nucleic Acids Res.*

692 2022;50(W1):W216-W221. doi:10.1093/nar/gkac194

693

694 Author Contributions

695 Conceptualization: V.A, P.A.P, C.J.C.; Methodology: C.J.C., L.F.S, R.S, D.N, E.N, A.R, V.K.M,  
696 H.D, D.M.M S.J.J.C, K.L.H, Investigation: V.A, P.A.P, L.F.S, C.J.C. Formal Analysis: C.J.C. Y.Z.  
697 ; Data Curation: C.J.C., R.S, V.K.M, H.D.; Visualization: V.A, C.J.C, L.F.S, P.A.P., Y.Z. D.N;  
698 Writing: V.A C.J.C. P.A.P; Manuscript Review: V.A,C.J.C., L.F.S, R.S, D.N, E.N, A.R V.K.M,  
699 H.D, D.M.M, G.M, S.E.B, S.J.J.C, K.L.H, , R.A.G and J.P, P.A.P ; Supervision: V.A, C.J.C.,  
700 R.A.G, J.P and P.A.P

701

702 Acknowledgements

703 This work was supported by NIH grants CA125123 (CJC), U19AI144297 (VA, CJC, RG, JP,  
704 PAP)

705 Conflict of Interest statement: The authors declare no competing interests.

706

707

708 TABLE 1. Demographic and Visit Characteristics by Matched Groups

|                                                   | Extremely high viral load cases<br>(n = 10)     | Low viral load cases<br>(n = 10)                  | Negative for SARS-CoV-2<br>(n = 10)             | p-value |
|---------------------------------------------------|-------------------------------------------------|---------------------------------------------------|-------------------------------------------------|---------|
| <b>Age<sup>a</sup>, years</b>                     | 51.5<br>(22.0, 69.0)                            | 46.0<br>(24.0, 80.0)                              | 51.0<br>(25.0, 70.0)                            | 0.998   |
| <b>Gender</b>                                     |                                                 |                                                   |                                                 | 1.000   |
| Male                                              | 6 (60.0%)                                       | 6 (60.0%)                                         | 6 (60.0%)                                       |         |
| Female                                            | 4 (40.0%)                                       | 4 (40.0%)                                         | 4 (40.0%)                                       |         |
| <b>Race</b>                                       |                                                 |                                                   |                                                 | 0.126   |
| Asian                                             | 1 (10.0%)                                       | 1 (10.0%)                                         | 0 (0.0%)                                        |         |
| Black                                             | 2 (20.0%)                                       | 0 (0.0%)                                          | 2 (20.0%)                                       |         |
| White                                             | 6 (60.0%)                                       | 3 (30.0%)                                         | 5 (50.0%)                                       |         |
| Other/Multiracial                                 | 1 (10.0%)                                       | 1 (10.0%)                                         | 0 (0.0%)                                        |         |
| Unknown/Declined                                  | 0 (0.0%)                                        | 5 (50.0%)                                         | 3 (30.0%)                                       |         |
| <b>Ethnicity</b>                                  |                                                 |                                                   |                                                 | 0.322   |
| Hispanic                                          | 3 (30.0%)                                       | 4 (40.0%)                                         | 3 (30.0%)                                       |         |
| Non-Hispanic                                      | 7 (70.0%)                                       | 3 (30.0%)                                         | 5 (50.0%)                                       |         |
| Unknown/Declined                                  | 0 (0.0%)                                        | 3 (30.0%)                                         | 2 (20.0%)                                       |         |
| <b>Disease Severity</b>                           |                                                 |                                                   |                                                 | 0.066   |
| Asymptomatic/Mild                                 | 4 (40.0%)                                       | 5 (50.0%)                                         | 9 (90.0%)                                       |         |
| Mild/Moderate                                     | 6 (60.0%)                                       | 5 (50.0%)                                         | 1 (10.0%)                                       |         |
| <b>Number of Co-morbid Conditions</b>             |                                                 |                                                   |                                                 | 0.906   |
| None                                              | 6 (60.0%)                                       | 5 (50.0%)                                         | 8 (80.0%)                                       |         |
| One                                               | 2 (20.0%)                                       | 3 (30.0%)                                         | 1 (10.0%)                                       |         |
| Two                                               | 1 (10.0%)                                       | 1 (10.0%)                                         | 0 (0.0%)                                        |         |
| Three +                                           | 1 (10.0%)                                       | 1 (10.0%)                                         | 1 (10.0%)                                       |         |
| <b>CDC week<sup>b</sup> [end date] at Visit 1</b> | 32 [08Aug20]<br>(26 [27Jun20]-<br>41 [10Oct20]) | 27.5 [11Jul20]<br>(24 [13Jun20]-<br>28 [11Jul20]) | 32 [08Aug20]<br>(26 [27Jun20]-<br>41 [10Oct20]) |         |
| <b>Duration<sup>a</sup>, days</b>                 |                                                 |                                                   |                                                 |         |
| between Visit 1 - Visit 2                         | 7.0 (5.0, 12.0)                                 | 9.5 (4.0, 13.0)                                   | N/A                                             |         |
| between Visit 2 - Visit 3                         | 7.5 (4.0, 20.0)                                 | 8.0 (4.0, 13.0)                                   | N/A                                             |         |
| between Visit 3 - Visit 4                         | 7.0                                             | 9.5 (7.0, 12.0)                                   | N/A                                             |         |
| <b>N1 Ct value<sup>a</sup></b>                    |                                                 |                                                   |                                                 |         |
| at Visit 1                                        | 14.5 (9.8, 15.8)                                | 34.1 (31.7, 36.3)                                 | N/A                                             |         |
| at Visit 2                                        | 26.6 (24.2, 33.9)                               | 36.1 (30.8, 38.2)                                 | N/A                                             |         |
| at Visit 3                                        | 35.7 (32.4, 38.2)                               | 35.6 (32.2, 38.5)                                 | N/A                                             |         |
| at Visit 4                                        | 34.3                                            | 33.6 (33.6, 33.7)                                 | N/A                                             |         |

709 Abbreviations: Ct=cycle threshold, <sup>a</sup>Median (Min, Max)<sup>b</sup>Median (IQR) or Median (Q1-Q3) or Median  
710 (25<sup>th</sup> percentile-75<sup>th</sup> percentile) or Median (lower quartile-upper quartile)

711 Differences between groups were determined using the Kruskal-Wallis test for variables with non-  
712 parametric distribution and by Fisher's Exact test for categorical variables. P-value <0.05 was considered  
713 significantly different between groups.



714 TABLE 2. Demographic Characteristics by Matched Groups with RNA sequencing Data

|                                           | Extremely<br>high viral load<br>cases<br>(N = 8) | Low viral load<br>cases<br>(N = 8) | Negative for<br>SARS-CoV-2<br>(N = 4) | p-value            |
|-------------------------------------------|--------------------------------------------------|------------------------------------|---------------------------------------|--------------------|
| <b>Age</b>                                |                                                  |                                    |                                       | 0.879 <sup>a</sup> |
| Median (Q1, Q3)                           | 39.5 (27.5, 57.5)                                | 46.0 (33.0, 55.0)                  | 45.5 (32.0, 57.0)                     |                    |
| Min, Max                                  | 22.0, 60.0                                       | 24.0, 80.0                         | 30.0, 57.0                            |                    |
| <b>Gender</b>                             |                                                  |                                    |                                       | 0.851 <sup>b</sup> |
| Male                                      | 4 (50.0%)                                        | 5 (62.5%)                          | 3 (75.0%)                             |                    |
| Female                                    | 4 (50.0%)                                        | 3 (37.5%)                          | 1 (25.0%)                             |                    |
| <b>Race</b>                               |                                                  |                                    |                                       | 0.158 <sup>b</sup> |
| Asian                                     | 1 (12.5%)                                        | 1 (12.5%)                          | 0 (0.0%)                              |                    |
| Black                                     | 2 (25.0%)                                        | 0 (0.0%)                           | 0 (0.0%)                              |                    |
| White                                     | 4 (50.0%)                                        | 2 (25.0%)                          | 1 (25.0%)                             |                    |
| Other/Multiracial                         | 1 (12.5%)                                        | 1 (12.5%)                          | 0 (0.0%)                              |                    |
| Unknown                                   | 0 (0.0%)                                         | 4 (50.0%)                          | 3 (75.0%)                             |                    |
| <b>Ethnicity</b>                          |                                                  |                                    |                                       | 0.297 <sup>b</sup> |
| Hispanic                                  | 2 (25.0%)                                        | 3 (37.5%)                          | 1 (25.0%)                             |                    |
| Non-Hispanic                              | 6 (75.0%)                                        | 3 (37.5%)                          | 1 (25.0%)                             |                    |
| Unknown                                   | 0 (0.0%)                                         | 2 (25.0%)                          | 2 (50.0%)                             |                    |
| <b>Disease Severity</b>                   |                                                  |                                    |                                       | 0.603 <sup>b</sup> |
| Asymptomatic/Mild                         | 3 (37.5%)                                        | 3 (37.5%)                          | 3 (75.0%)                             |                    |
| Mild/Moderate                             | 5 (62.5%)                                        | 5 (62.5%)                          | 1 (25.0%)                             |                    |
| <b>Number of Co-morbid<br/>Conditions</b> |                                                  |                                    |                                       | 0.656 <sup>b</sup> |
| None                                      | 5 (62.5%)                                        | 4 (50.0%)                          | 4 (100.0%)                            |                    |
| One                                       | 1 (12.5%)                                        | 3 (37.5%)                          | 0 (0.0%)                              |                    |
| Two                                       | 1 (12.5%)                                        | 0 (0.0%)                           | 0 (0.0%)                              |                    |
| Three +                                   | 1 (12.5%)                                        | 1 (12.5%)                          | 0 (0.0%)                              |                    |
| <b>Sample Collected</b>                   |                                                  |                                    |                                       |                    |
| at Visit 1 only                           | 0                                                | 1                                  | 4                                     |                    |
| at Visits 1, 2, 3                         | 5                                                | 2                                  | 0                                     |                    |
| at Visits 1, 2, 3, 4                      | 1                                                | 0                                  | 0                                     |                    |
| at Visit 2 only                           | 0                                                | 2                                  | 0                                     |                    |
| at Visits 1, 2                            | 0                                                | 1                                  | 0                                     |                    |
| at Visits 1, 3                            | 2                                                | 0                                  | 0                                     |                    |
| at Visits 1, 2, 4                         | 0                                                | 1                                  | 0                                     |                    |
| at Visits 1, 3, 4                         | 0                                                | 1                                  | 0                                     |                    |
| <b>Number of Samples per Subject</b>      |                                                  |                                    |                                       |                    |
| One                                       | 0                                                | 3                                  | 4                                     |                    |
| Two                                       | 2                                                | 1                                  | 0                                     |                    |
| Three                                     | 5                                                | 4                                  | 0                                     |                    |
| Four                                      | 1                                                | 0                                  | 0                                     |                    |

715 Differences between groups were determined using the Kruskal-Wallis test for variables with non-  
716 parametric distribution and by Fisher's Exact test for categorical variables. P-value <0.05 was considered  
717 significantly different between groups.

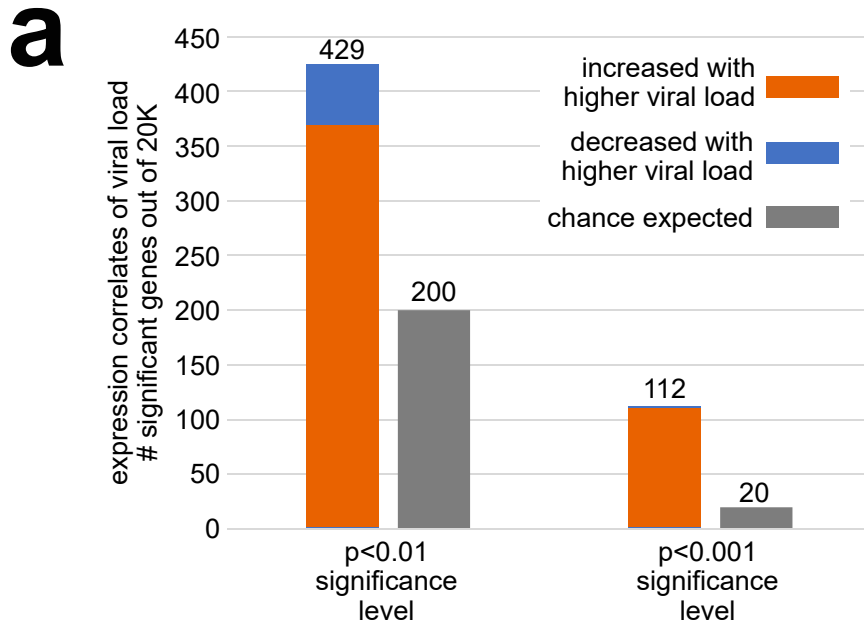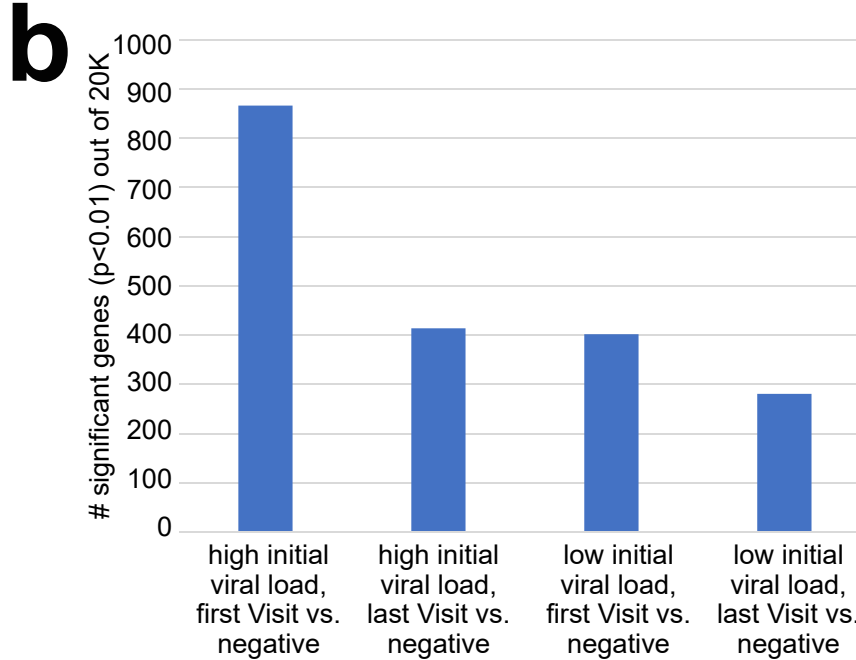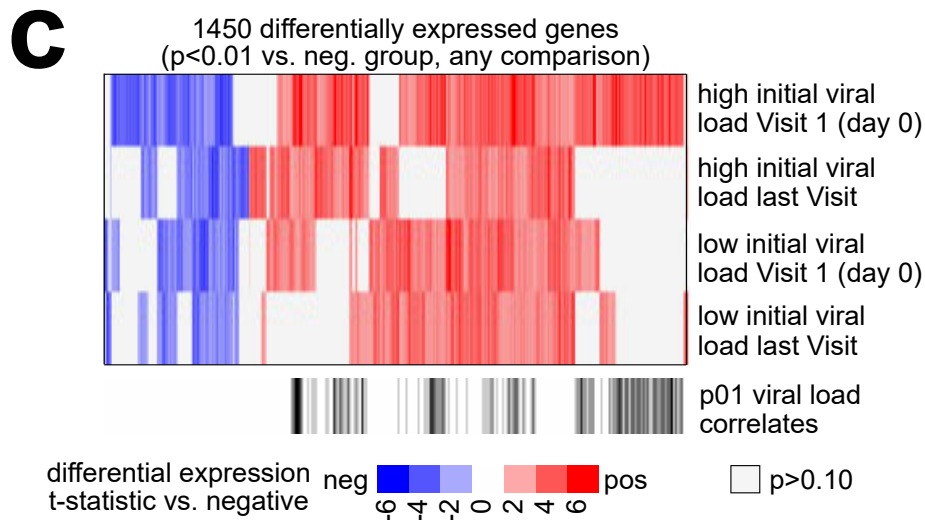

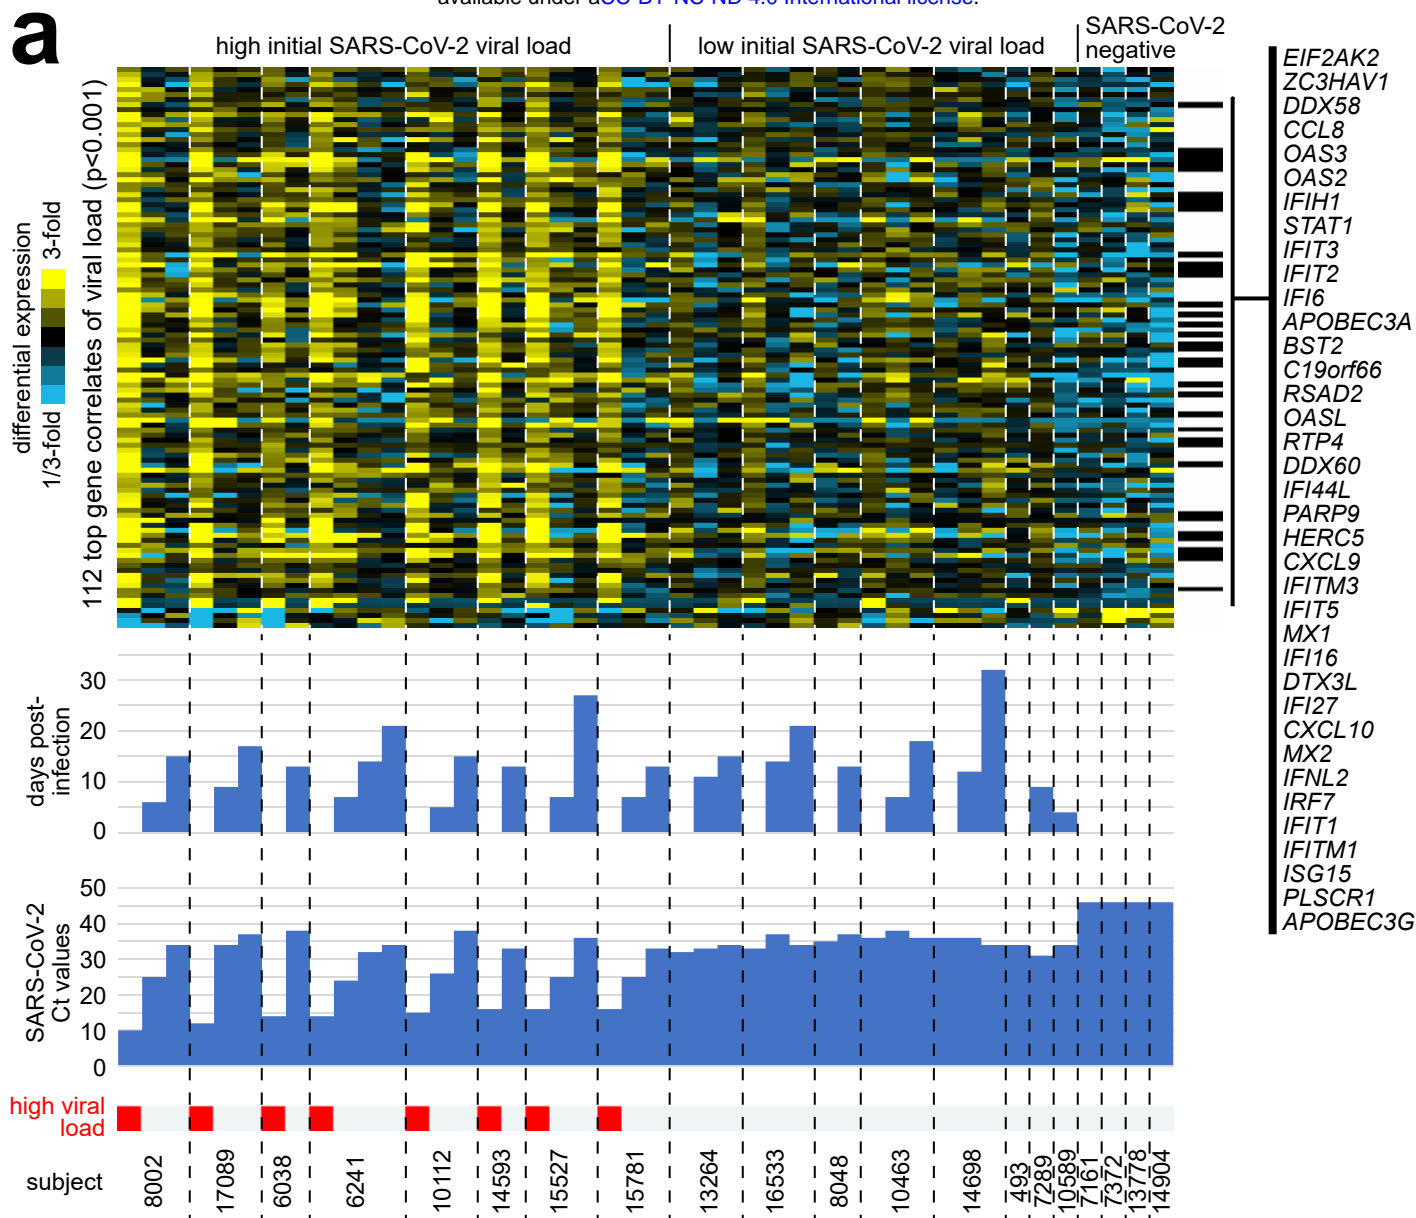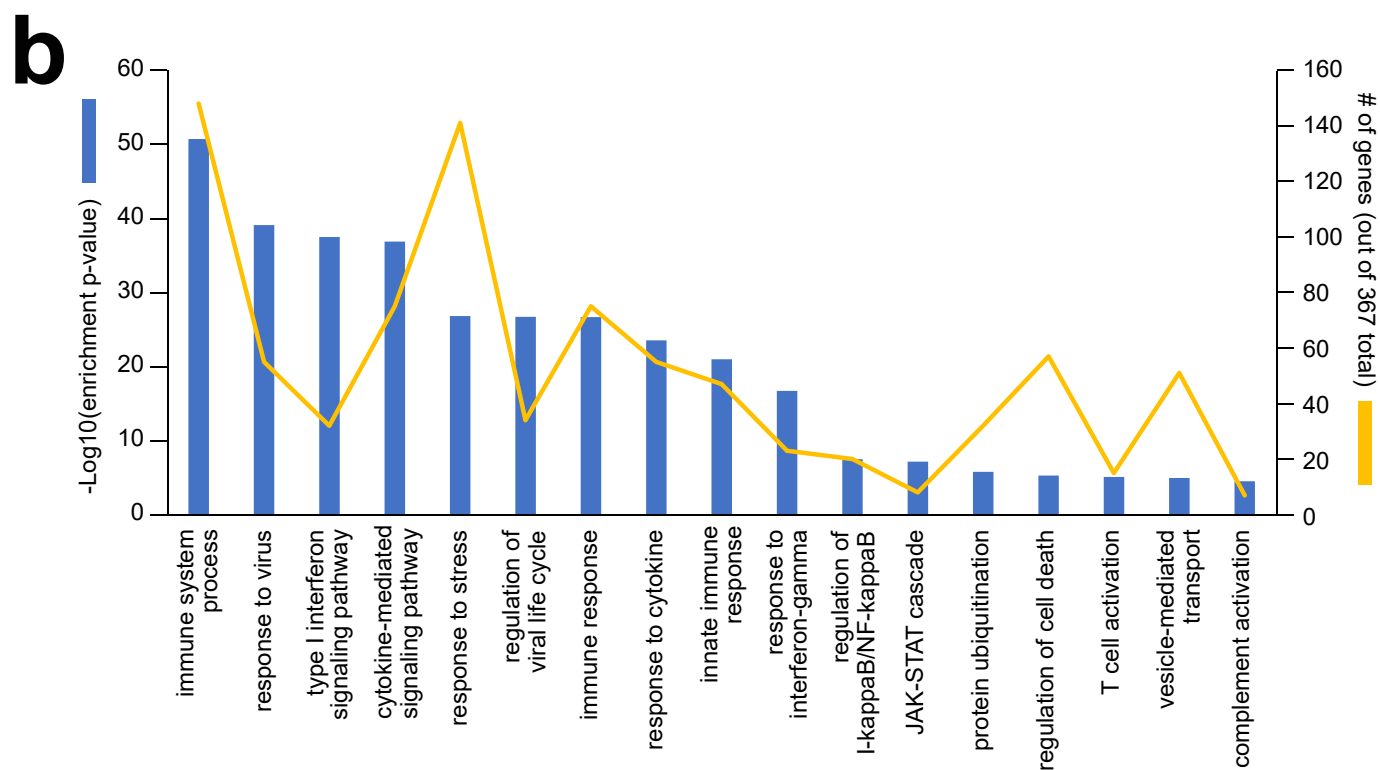

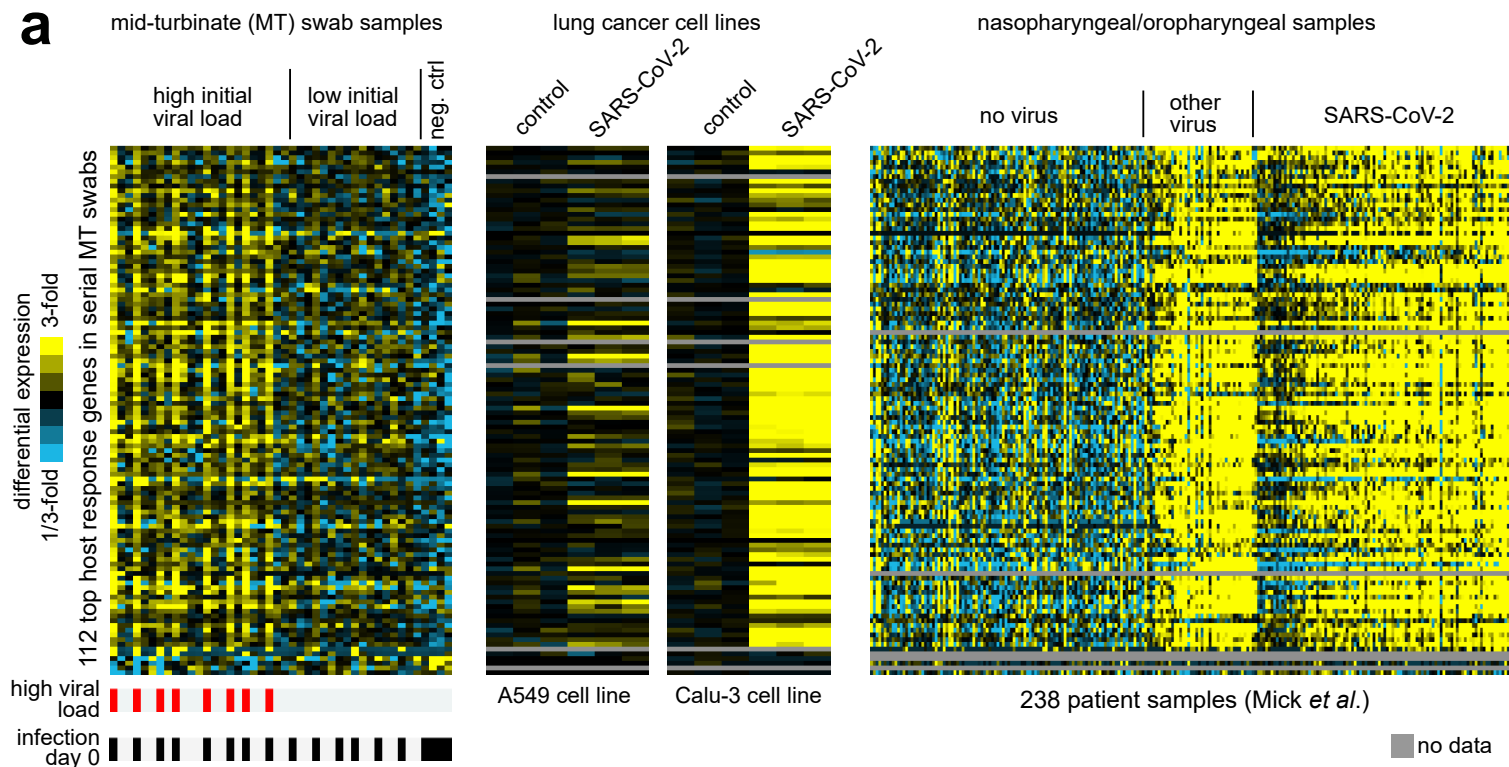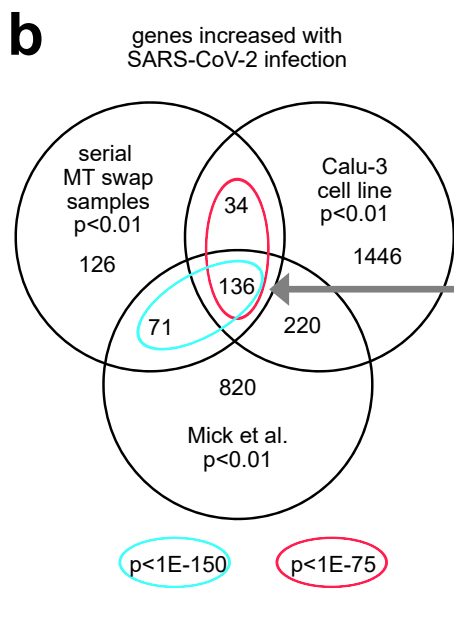

|          |        |          |          |
|----------|--------|----------|----------|
| ADAR     | GBP4   | LSM12    | SAMD9    |
| AEN      | GBP5   | MMP13    | SAMD9L   |
| APOBEC3G | GMPR   | MX1      | SECTM1   |
| APOL1    | HELZ2  | MX2      | SERPING1 |
| APOL2    | HERC5  | MYD88    | SLC15A3  |
| APOL6    | HERC6  | NCOA7    | SLC25A28 |
| ARID4B   | HLA-F  | NMI      | SLFN5    |
| ARID5B   | HSH2D  | NR3C1    | SP110    |
| B2M      | IDO1   | NUB1     | SPATS2L  |
| BAK1     | IFI16  | NUPR1    | SPSB1    |
| BST2     | IFI27  | OAS1     | STAT1    |
| CASP1    | IFI35  | OAS2     | STAT2    |
| CCL2     | IFI44  | OAS3     | TAP1     |
| CCR1     | IFI44L | OASL     | TAP2     |
| CFB      | IFI6   | OGFR     | TGM2     |
| CHMP5    | IFIH1  | OPTN     | TNFAIP3  |
| CMPK2    | IFIT1  | PARP12   | TNFSF10  |
| CNP      | IFIT2  | PARP14   | TNFSF13B |
| CX3CL1   | IFIT3  | PARP9    | TOR1B    |
| CXCL10   | IFIT5  | PCGF5    | TRAFD1   |
| CXCL11   | IFITM1 | PIK3AP1  | TRANK1   |
| CXCL9    | IFITM3 | PLEKHA4  | TRIM21   |
| DDX58    | IL4I1  | PLSCR1   | TRIM25   |
| DDX60    | IRF1   | PPM1K    | TRIM38   |
| DHX58    | IRF2   | PRKD2    | UBD      |
| DTX3L    | IRF7   | PSMA6    | UBE2L6   |
| DUOXA2   | ISG15  | PSMB8    | UBE2Z    |
| EHD4     | ISG20  | PSMB9    | USP18    |
| EIF2AK2  | JUN    | RASGEF1B | WARS     |
| EPSTI1   | LAMP3  | RBCK1    | XAF1     |
| ETV7     | LAP3   | RBMS2    | ZBP1     |
| FST      | LGALS9 | RNF114   | ZC3HAV1  |
| GBP1     | LGMN   | RSAD2    | ZFP36L2  |
| GBP2     | LMO2   | RTP4     | ZNFX1    |

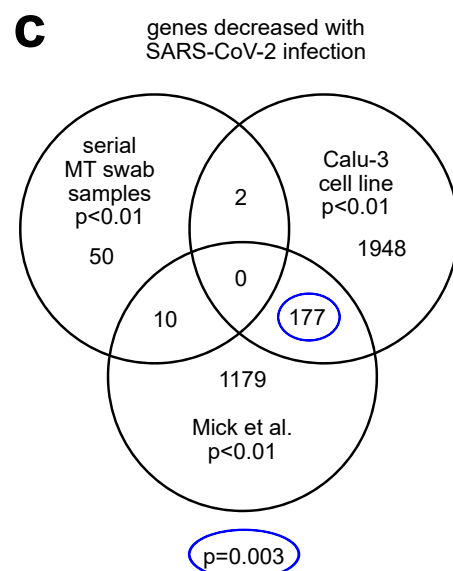

**a**

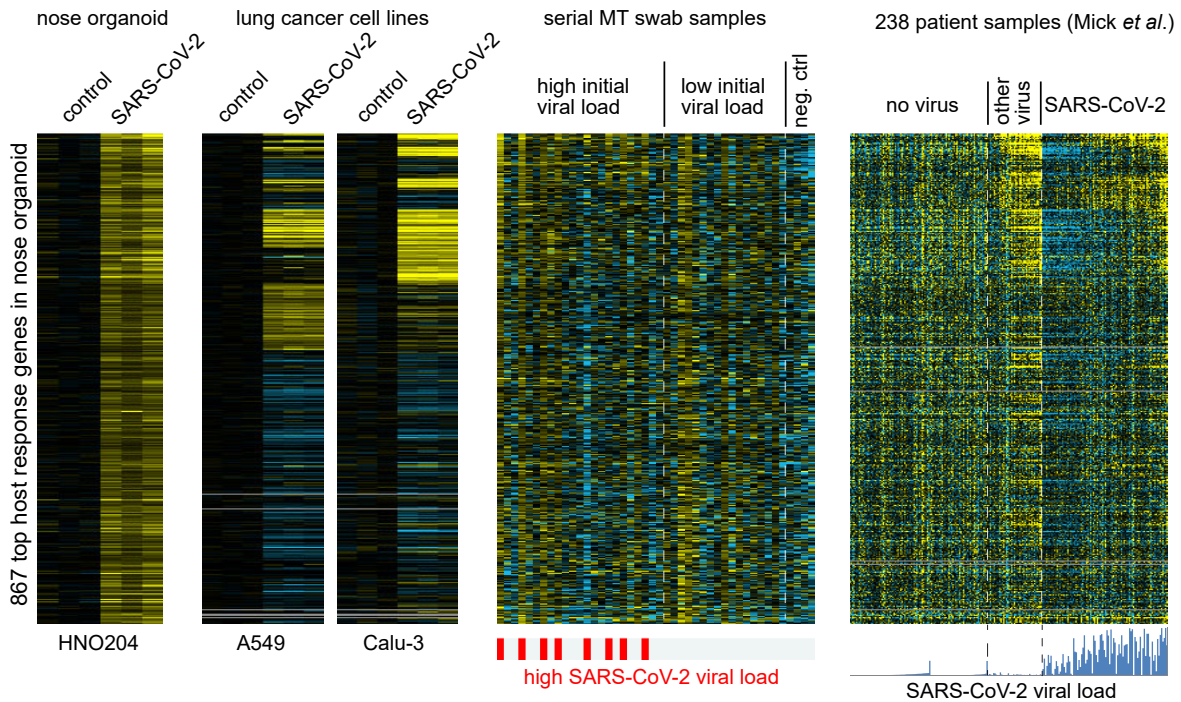

**b**

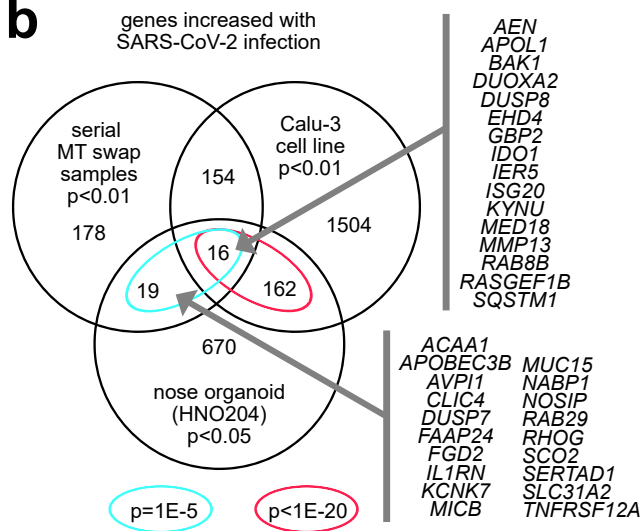

**c**

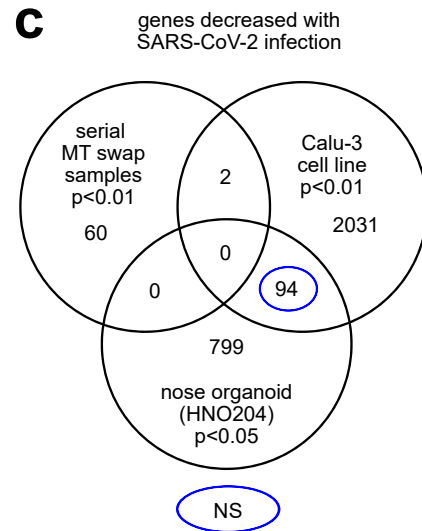

**d**

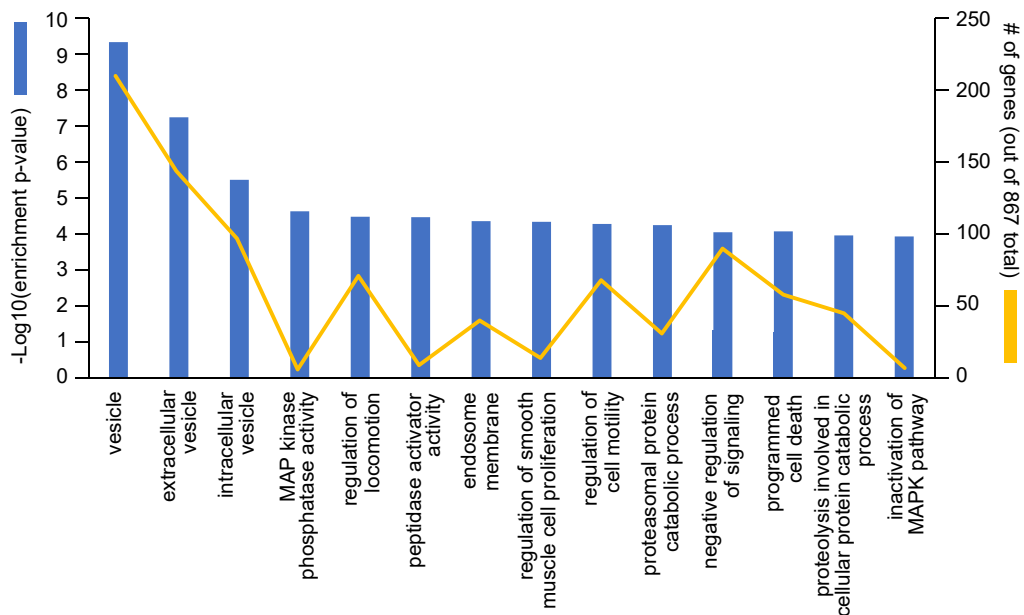



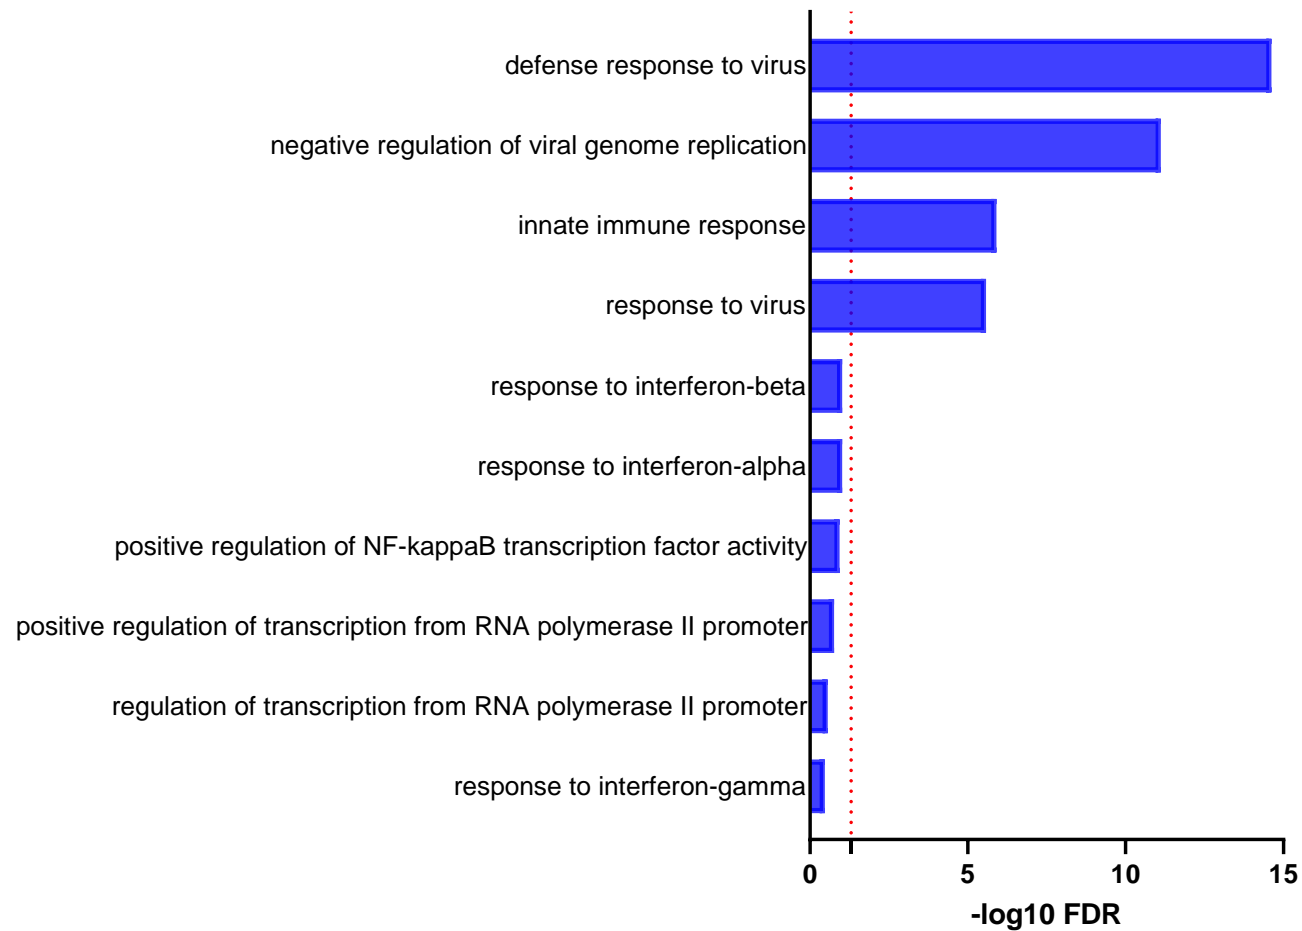

**Figure S2: Gene ontology analysis of differentially expressed genes present only in high day 0 infection.** The top10 enriched GO terms for biological processes altered in shown. Significantly enriched GO terms with a minimum three enriched genes were ranked by significance. The x-axis denoting the negative log fold change of significance. Dotted red line depicts the significance threshold of  $FDR < 0.05$ .
